# Supplementary material
Source: PubMed Central journal article supplement (PMC7015543)
Supplement: ehp-128-017008-s002.pdf [file ehp-128-017008-s002.pdf]

**Note to readers with disabilities:** *EHP* strives to ensure that all journal content is accessible to all readers. However, some figures and Supplemental Material published in *EHP* articles may not conform to [508 standards](#) due to the complexity of the information being presented. If you need assistance accessing journal content, please contact [ehp508@niehs.nih.gov](mailto:ehp508@niehs.nih.gov). Our staff will work with you to assess and meet your accessibility needs within 3 working days.

### **Supplemental Material**

#### **Privacy Risks of Sharing Data from Environmental Health Studies**

Katherine E. Boronow, Laura J. Perovich, Latanya Sweeney, Ji Su Yoo, Ruthann A. Rudel, Phil Brown, and Julia Green Brody

#### **Table of Contents**

**Table S1.** Members of the Advisory Council that convened in 2013 and evaluated the selection of environmental health studies highlighted in this article.

**Table S2.** Chemicals ranked by highest absolute loadings on the first principal component resulting from principal component analysis of air and dust measurements in the Household Exposure Study.

**Table S3.** Chemicals ranked by highest absolute loadings on the first principal component resulting from principal component analysis of air measurements in the Green Housing Study.
